# Supplementary material for: Evaluation des Projekts zur Einführung von Laienreanimation an Schulen in Nordrhein-Westfalen
Source: Springer Nature journal article supplement (doi:10.1007/s00101-020-00889-1), 2020-11-26
Supplement: MOESM1 [file 18629266]

Zusatzmaterial zum Beitrag "Evaluation des Projekts zur Einführung von Laienreanimation an Schulen in Nordrhein-Westfalen

Marc Felzen, Hanna Schröder, Stefan K. Beckers et al. (2020) *Der Anaesthetist*.

Beitrag und Zusatzmaterial stehen Ihnen auf [www.springermedizin.de](http://www.springermedizin.de) zur Verfügung. Bitte geben Sie dort den Beitragstitel in die Suche ein.

| <b>Gesamtanzahl Schulen, Klassen + Schüler der Jahrgangsstufe 8 in NRW</b>               |         |                       |
|------------------------------------------------------------------------------------------|---------|-----------------------|
| Anzahl Schulen                                                                           |         | 2.708                 |
| Anzahl 8. Klassen                                                                        |         | 6.540                 |
| Anzahl Schüler Jahrgangsstufe 8                                                          |         | 170.591               |
| <b>Einmalige Puppenbeschaffung (Vimetecsa Practiman), Haltbarkeit mindestens 5 Jahre</b> |         |                       |
| Kosten pro Puppe                                                                         | 43,00 € | <b>4.657.760,00 €</b> |
| Anzahl Puppen pro Schule                                                                 | 40      |                       |
| <b>Jährliche Wartungskosten pro Puppe</b>                                                |         |                       |
| Lungen + Mundstücke + Desinfektion                                                       | 2,65 €  | 287.048 €             |
| <b>Jährliche Schulungskosten</b>                                                         |         |                       |
| Kosten pro Lehrer                                                                        | 10 €    | 54.160 €              |
| Anzahl Lehrer pro Schule pro Jahr                                                        | 2       |                       |
| <b>Gesamtkosten pro Jahr</b>                                                             |         | <b>341.208,00 €</b>   |
| <i>Kosten pro Schüler der 8. Klasse</i>                                                  |         | <i>2,00 €</i>         |
